# Supplementary material
Source: MDPI journal article supplement (https://www.mdpi.com/2673-1924/3/4/31)

# Supplementary Data

**Table S1. Mean  $\pm$  SD fatty acid levels (mass % of total) for blood components from Bristol Bay belugas (BBB, n=9) and oceanaria-based belugas (OBB, n=14)**

| FA                                        | BBB - RBC          | OBB - RBC          | BBB - WB           | OBB - WB           | BBB - Plasma       | OBB - Plasma       | BBB-Blub | OBB-Blub | OBB-DBS | OBB - Diet         |
|-------------------------------------------|--------------------|--------------------|--------------------|--------------------|--------------------|--------------------|----------|----------|---------|--------------------|
| <i>Saturated fatty acids (SFA)</i>        |                    |                    |                    |                    |                    |                    |          |          |         |                    |
| C14:0                                     | 0.36% $\pm$ 0.06%  | 0.60% $\pm$ 0.12%  | 0.74% $\pm$ 0.00%  | 1.53% $\pm$ 0.00%  | 1.17% $\pm$ 0.29%  | 2.20% $\pm$ 0.39%  | 4.53%    | 8.06%    | 1.06%   | 5.17% $\pm$ 3.00%  |
| C15:0                                     |                    |                    |                    |                    |                    |                    | 1.63%    | 0.84%    |         |                    |
| C16:0                                     | 11.79% $\pm$ 0.45% | 13.62% $\pm$ 0.52% | 10.48% $\pm$ 0.00% | 11.54% $\pm$ 0.01% | 10.05% $\pm$ 0.48% | 10.63% $\pm$ 0.78% | 9.87%    | 8.20%    | 12.49%  | 16.49% $\pm$ 1.36% |
| C17:0                                     | 2.41% $\pm$ 0.25%  | 1.40% $\pm$ 0.39%  |                    |                    | 0.47% $\pm$ 0.05%  | 0.41% $\pm$ 0.04%  | 0.44%    | 0.43%    | 0.67%   |                    |
| C18:0                                     | 25.61% $\pm$ 0.71% | 18.71% $\pm$ 2.28% | 15.99% $\pm$ 0.02% | 11.07% $\pm$ 0.01% | 9.01% $\pm$ 1.19%  | 7.35% $\pm$ 0.79%  | 3.84%    | 2.94%    | 12.68%  | 2.87% $\pm$ 0.19%  |
| C20:0                                     | 0.64% $\pm$ 0.06%  | 0.56% $\pm$ 0.05%  | 0.84% $\pm$ 0.00%  | 0.75% $\pm$ 0.00%  | 0.38% $\pm$ 0.10%  | 0.31% $\pm$ 0.06%  | 0.30%    | 0.20%    | 0.52%   |                    |
| C22:0                                     | 0.43% $\pm$ 0.06%  | 0.19% $\pm$ 0.07%  | 0.47% $\pm$ 0.00%  | 0.20% $\pm$ 0.00%  | 0.05% $\pm$ 0.01%  | 0.03% $\pm$ 0.01%  | 0.09%    | 0.05%    | 0.35%   |                    |
| C24:0                                     | 0.68% $\pm$ 0.12%  | 0.16% $\pm$ 0.09%  | 1.00% $\pm$ 0.00%  | 0.19% $\pm$ 0.00%  | 0.01% $\pm$ 0.01%  | 0.01% $\pm$ 0.01%  | 0.16%    | 0.03%    | 0.20%   |                    |
| <i>Monounsaturated fatty acids (MUFA)</i> |                    |                    |                    |                    |                    |                    |          |          |         |                    |
| C16:1n7t                                  | 0.37% $\pm$ 0.02%  | 0.56% $\pm$ 0.09%  | 0.56% $\pm$ 0.00%  | 1.55% $\pm$ 0.00%  | 0.85% $\pm$ 0.25%  | 2.40% $\pm$ 0.20%  | 0.84%    | 0.97%    | 1.65%   |                    |
| C16:1n7                                   | 1.98% $\pm$ 0.22%  | 1.70% $\pm$ 0.27%  | 5.63% $\pm$ 0.00%  | 5.08% $\pm$ 0.01%  | 9.50% $\pm$ 0.87%  | 7.32% $\pm$ 0.81%  | 15.67%   | 21.95%   | 5.83%   | 7.55% $\pm$ 0.35%  |
| C18:1t                                    | 0.27% $\pm$ 0.08%  | 1.14% $\pm$ 0.49%  | 0.32% $\pm$ 0.00%  | 0.32% $\pm$ 0.00%  | 0.37% $\pm$ 0.15%  | 0.33% $\pm$ 0.02%  | 0.29%    | 0.15%    | 0.80%   |                    |
| C18:1n9                                   | 15.19% $\pm$ 0.97% | 12.31% $\pm$ 0.95% | 21.23% $\pm$ 0.01% | 22.87% $\pm$ 0.01% | 27.97% $\pm$ 1.28% | 28.11% $\pm$ 1.78% | 30.16%   | 28.80%   | 24.00%  | 19.32% $\pm$ 2.70% |
| C20:1n9                                   | 0.98% $\pm$ 0.40%  | 8.20% $\pm$ 3.44%  | 0.94% $\pm$ 0.00%  | 5.99% $\pm$ 0.02%  | 0.84% $\pm$ 0.53%  | 5.02% $\pm$ 2.07%  | 3.96%    | 7.64%    | 2.64%   | 11.70% $\pm$ 1.62% |
| C22:1n9                                   | 0.24% $\pm$ 0.19%  | 4.45% $\pm$ 1.50%  | 0.14% $\pm$ 0.00%  | 2.39% $\pm$ 0.01%  | 0.10% $\pm$ 0.09%  | 1.40% $\pm$ 0.62%  | 1.31%    | 4.34%    | 1.15%   | 15.53% $\pm$ 2.36% |
| C24:1n9                                   | 1.64% $\pm$ 0.19%  | 1.61% $\pm$ 0.21%  | 2.32% $\pm$ 0.00%  | 2.04% $\pm$ 0.00%  | 0.58% $\pm$ 0.12%  | 0.42% $\pm$ 0.08%  | 0.50%    | 0.36%    | 1.07%   |                    |
| <i>Polyunsaturated fatty acids (PUFA)</i> |                    |                    |                    |                    |                    |                    |          |          |         |                    |
| C18:2n6t                                  | 0.19% $\pm$ 0.03%  | 0.34% $\pm$ 0.06%  | 0.21% $\pm$ 0.00%  | 0.16% $\pm$ 0.00%  | 0.26% $\pm$ 0.02%  | 0.20% $\pm$ 0.02%  | 0.46%    | 0.48%    | 0.19%   |                    |
| C18:2n6                                   | 0.51% $\pm$ 0.08%  | 0.72% $\pm$ 0.14%  | 0.68% $\pm$ 0.00%  | 1.09% $\pm$ 0.00%  | 1.01% $\pm$ 0.21%  | 1.42% $\pm$ 0.34%  | 1.10%    | 1.19%    | 1.08%   | 1.00% $\pm$ 0.17%  |
| C18:3n3                                   | 0.02% $\pm$ 0.01%  | 0.03% $\pm$ 0.02%  | 0.06% $\pm$ 0.00%  | 0.12% $\pm$ 0.00%  | 0.13% $\pm$ 0.06%  | 0.22% $\pm$ 0.07%  | 0.41%    | 0.54%    | 0.10%   | 0.41% $\pm$ 0.04%  |
| C18:3n6                                   | 0.08% $\pm$ 0.01%  | 0.06% $\pm$ 0.01%  | 0.12% $\pm$ 0.00%  | 0.08% $\pm$ 0.00%  | 0.21% $\pm$ 0.04%  | 0.14% $\pm$ 0.04%  | 0.15%    | 0.11%    | 0.15%   |                    |
| C20:2n6                                   | 0.11% $\pm$ 0.02%  | 0.09% $\pm$ 0.02%  | 0.08% $\pm$ 0.00%  | 0.12% $\pm$ 0.00%  | 0.07% $\pm$ 0.02%  | 0.05% $\pm$ 0.02%  | 0.47%    | 0.48%    | 0.18%   |                    |
| C20:3n6                                   | 0.22% $\pm$ 0.03%  | 0.26% $\pm$ 0.03%  | 0.21% $\pm$ 0.00%  | 0.25% $\pm$ 0.00%  | 0.18% $\pm$ 0.02%  | 0.22% $\pm$ 0.03%  | 0.09%    | 0.12%    | 0.26%   |                    |
| C20:4n6                                   | 22.05% $\pm$ 0.86% | 12.16% $\pm$ 3.86% | 16.01% $\pm$ 0.02% | 7.08% $\pm$ 0.03%  | 11.51% $\pm$ 2.38% | 4.62% $\pm$ 2.24%  | 2.42%    | 0.78%    | 10.20%  | 0.47% $\pm$ 0.09%  |
| C20:5n3                                   | 11.11% $\pm$ 0.33% | 16.15% $\pm$ 1.28% | 9.74% $\pm$ 0.01%  | 14.81% $\pm$ 0.00% | 9.30% $\pm$ 1.03%  | 14.57% $\pm$ 2.10% | 5.09%    | 3.07%    | 14.73%  | 10.09% $\pm$ 0.09% |
| C22:4n6                                   | 0.16% $\pm$ 0.02%  | 0.03% $\pm$ 0.01%  | 0.20% $\pm$ 0.00%  | 0.05% $\pm$ 0.00%  | 0.21% $\pm$ 0.05%  | 0.05% $\pm$ 0.02%  | 0.21%    | 0.11%    | 0.05%   |                    |
| C22:5n6                                   | 0.17% $\pm$ 0.02%  | 0.02% $\pm$ 0.01%  | 0.29% $\pm$ 0.00%  | 0.07% $\pm$ 0.00%  | 0.30% $\pm$ 0.06%  | 0.07% $\pm$ 0.02%  | 0.45%    | 0.13%    | 0.08%   |                    |
| C22:5n3                                   | 1.01% $\pm$ 0.15%  | 1.08% $\pm$ 0.15%  | 2.44% $\pm$ 0.01%  | 3.16% $\pm$ 0.01%  | 3.34% $\pm$ 1.03%  | 3.82% $\pm$ 1.00%  | 3.84%    | 2.78%    | 2.57%   | 0.98% $\pm$ 0.05%  |
| C22:6n3                                   | 4.20% $\pm$ 0.46%  | 3.81% $\pm$ 0.42%  | 9.30% $\pm$ 0.02%  | 7.54% $\pm$ 0.01%  | 12.60% $\pm$ 1.49% | 8.69% $\pm$ 1.02%  | 11.98%   | 4.86%    | 5.28%   | 8.42% $\pm$ 0.48%  |
| O3I                                       | 15.31% $\pm$ 0.72% | 19.96% $\pm$ 1.32% | 19.05% $\pm$ 0.02% | 22.35% $\pm$ 0.02% | 21.90% $\pm$ 1.28% | 23.26% $\pm$ 1.93% | 17.07%   | 7.93%    | 20.01%  |                    |

TableS2. Mean percent of fatty acids in composite diet from percentage of FA in fish fed, example OBB\_SWC

|            | Mackerel | Herring | Capelin | Composite |
|------------|----------|---------|---------|-----------|
| Fatty acid | 5%       | 50%     | 45%     |           |
| C14:0      | 4.9%     | 4.8%    | 5.1%    | 4.93%     |
| C16:0      | 17.3%    | 19.1%   | 9.2%    | 15.79%    |
| C16:1n7t   | 3.2%     | 0.4%    | 0.2%    | 0.44%     |
| C16:1n7    | 2.8%     | 6.3%    | 9.0%    | 0.00%     |
| C18:0      | 7.2%     | 3.1%    | 1.9%    | 2.81%     |
| C18:1t     | 0.5%     | 0.4%    | 0.7%    | 0.52%     |
| C18:1n9    | 10.6%    | 25.1%   | 5.6%    | 18.38%    |
| C18:2n6t   | 0.7%     | 1.1%    | 0.6%    | 0.93%     |
| C18:2n6    | 1.4%     | 0.5%    | 1.8%    | 0.96%     |
| C18:3n6    | 0.3%     | 0.1%    | 0.1%    | 0.09%     |
| C18:3n3    | 0.6%     | 0.5%    | 0.2%    | 0.40%     |
| C20:0      | 0.4%     | 0.4%    | 0.3%    | 0.32%     |
| C20:1n9,11 | 2.8%     | 7.2%    | 19.3%   | 11.02%    |
| C20:2n6    | 2.3%     | 1.3%    | 1.0%    | 1.26%     |
| C22:0      | 0.2%     | 0.1%    | 0.0%    | 0.07%     |
| C22.1n9,11 | 3.3%     | 8.9%    | 26.6%   | 14.60%    |
| C20:3n6    | 0.2%     | 0.2%    | 0.1%    | 0.15%     |
| C20:4n6    | 3.9%     | 0.6%    | 0.1%    | 0.50%     |
| C24:0      | 0.1%     | 0.0%    | 0.0%    | 0.04%     |
| C20:5n3    | 8.4%     | 9.4%    | 10.2%   | 9.61%     |
| C24:1n9    | 0.4%     | 0.7%    | 0.6%    | 0.64%     |
| C22:4n6    | 0.6%     | 0.0%    | 0.0%    | 0.04%     |
| C22:5n6    | 1.4%     | 0.1%    | 0.0%    | 0.11%     |
| C22:5n3    | 2.7%     | 0.9%    | 1.0%    | 0.97%     |
| C22:6n3    | 23.8%    | 8.7%    | 6.3%    | 8.29%     |

**Figure S1.** OBB diet percentages based on fish type, per location, SeaWorld of California (SWC), SeaWorld of Texas (SWT), and SeaWorld of Florida (SWF). Whisker plots with quartile and median values.

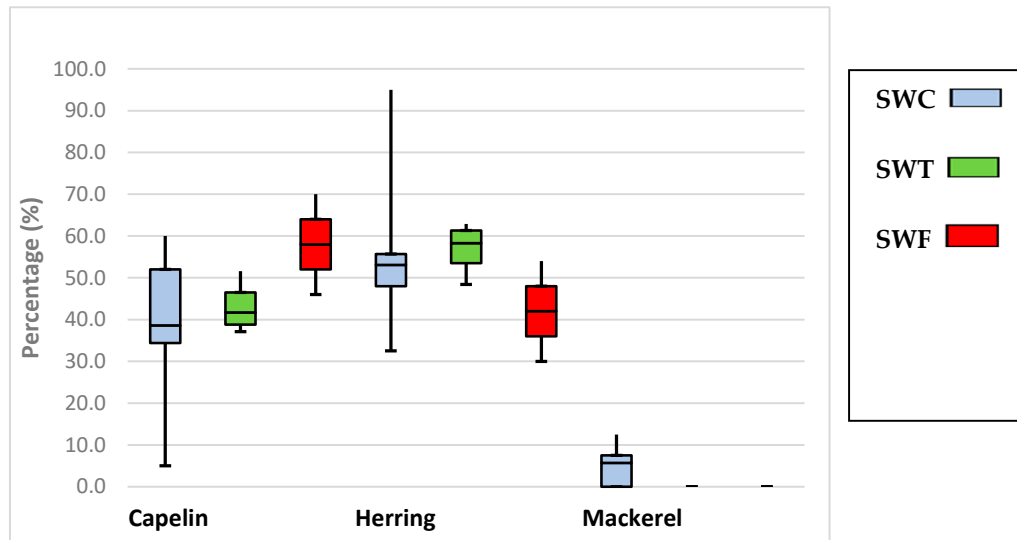

**Figure S2.** A comparison of mean fatty acid patterns in 30 random samples of human blood comparing whole (liquid) blood (WB) to dried blood spots (DBS).

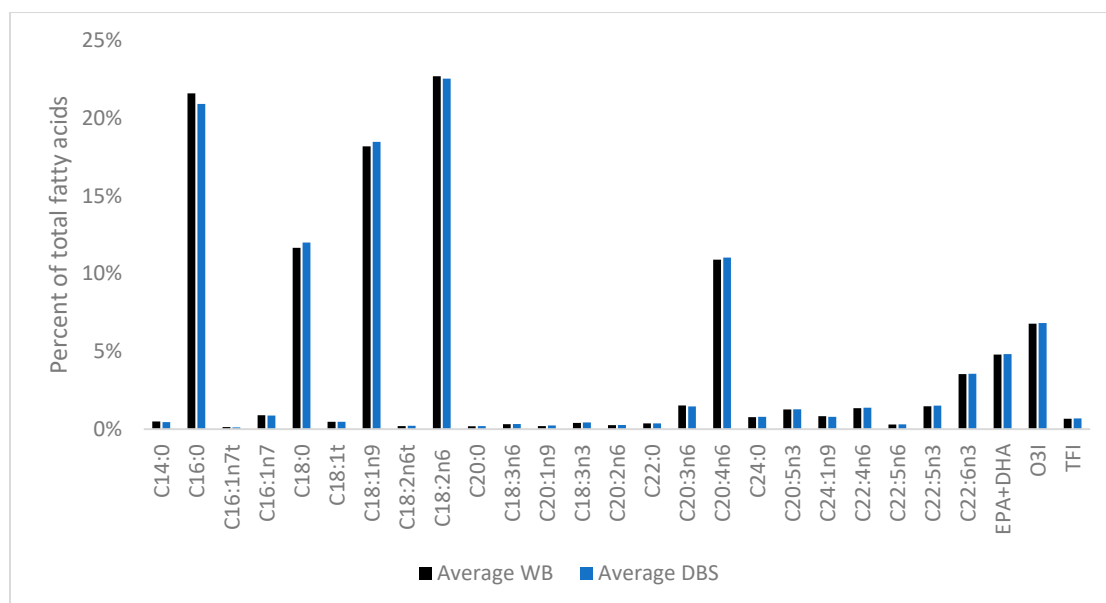

**Figure S3.** PCA of fatty acid signatures in blubber, plasma, and RBCs of 9 wild belugas (blue) and 14 oceanaria-based belugas from different locations, SeaWorld California (SWC-Blue), SeaWorld Florida (SWF-Red), SeaWorld Texas (SWT-Green) and wild beluga, BBB (Purple). Ellipses show 95% confidence intervals (CIs) around each sample type. Blubber samples of wild and oceanaria-based beluga show more similar fatty acid profiles with overlap of ellipses. PC1 and PC2 explain 65% of the variance.

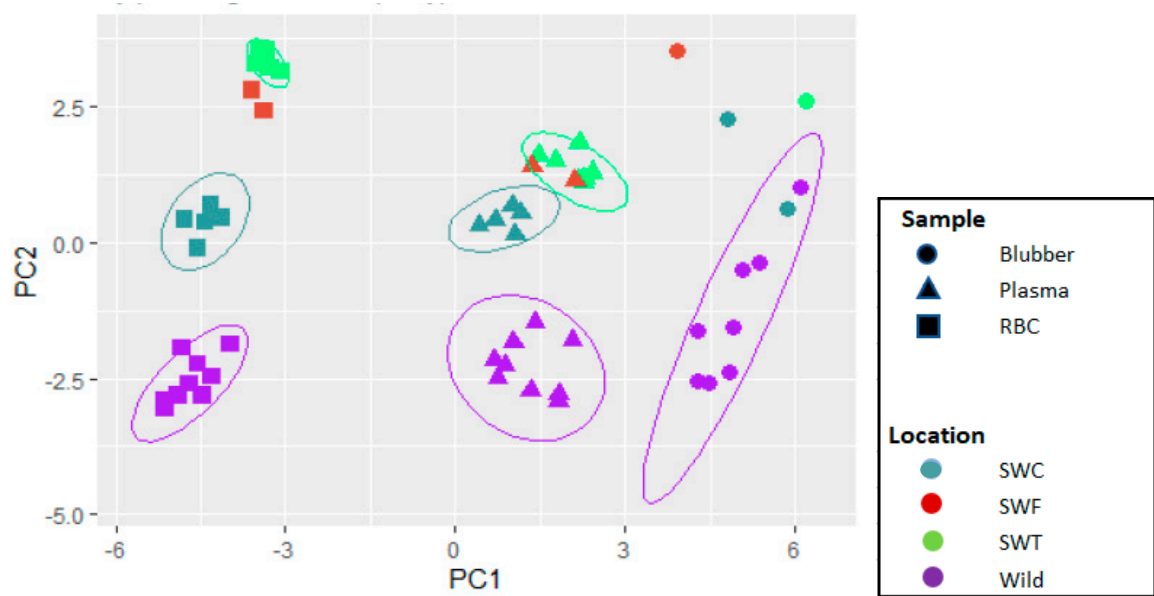

Supplement: s1 [file s1]
